# Supplementary material
Source: publisher figshare collection journal article supplement (https://karger.figshare.com/articles/dataset/_/8313056)
Supplement: Supplementary file 1 [file 1]

**Table S1. Patient's characteristics pre-surgery and post-surgery depicted by surgery type**

|                         | Sleeve Gastrectomy |                   | Gastric Bypass    |                   | Gastric Banding   |                   | p-value* | p-value** |
|-------------------------|--------------------|-------------------|-------------------|-------------------|-------------------|-------------------|----------|-----------|
|                         | pre-surgery        | post-surgery      | pre-surgery       | post-surgery      | pre-surgery       | post-surgery      |          |           |
| Age, years              | 42 (36,45)         | 44 (38, 47)       | 39 (34, 46)       | 41 (35, 48)       | 40 (36, 47)       | 42 (38, 46)       | 0.542    |           |
| Weight, kg              | 131 (120,157)      | 90 (80, 109)      | 128 (115, 142)    | 84 (72, 95)       | 124 (113, 134)    | 96 (85, 114)      | 0.015    | <0.001    |
| BMI, kg/m <sup>2</sup>  | 45.5 (41.2, 54.9)  | 31.2 (28.3, 36.2) | 45.1 (42.4, 49.2) | 29.1 (26.6, 33.0) | 42.9 (40.2, 46.1) | 33.2 (29.7, 40.2) | 0.005    | <0.001    |
| Waist Circumference, cm | 136 (126,150)      | 106 (100, 119)    | 129 (122, 139)    | 103 (96, 109)     | 132 (125, 145)    | 114 (95, 122)     | 0.025    | 0.019     |
| Systolic BP, mmHG       | 145 (136,160)      | 130 (120, 143)    | 145 (130, 155)    | 125 (115,136)     | 140 (140, 150)    | 122 (111, 145)    | 0.410    | 0.205     |
| Diastolic BP, mmHg      | 90 (80,100)        | 80 (74, 90)       | 90 (85, 100)      | 80 (73, 90)       | 90 (80, 90)       | 82 (78, 90)       | 0.050    | 0.675     |
| Glucose, mmol/l         |                    |                   |                   |                   |                   |                   |          |           |
| Fasting                 | 5.1 (4.9, 6.4)     | 4.4 (4.3, 5.2)    | 4.9 (4.6, 5.5)    | 4.3 (4.1, 4.7)    | 5.0 (4.6, 5.6)    | 4.6 (4.3, 5.0)    | 0.005    | <0.001    |
| 1-hour                  | 9.1 (7.4, 11.9)    | 7.7 (5.6, 8.8)    | 8.6 (7.1, 10.1)   | 8.0 (6.2, 9.9)    | 7.6 (6.4, 10.4)   | 7.4 (5.2, 9.1)    | 0.038    | 0.207     |
| 2-hour                  | 6.8 (5.3, 8.2)     | 3.7 (2.8, 5.5)    | 5.8 (4.7,7.3)     | 3.2 (2.4, 4.2)    | 5.9 (5.1, 7.5)    | 4.6 (3.8, 6.1)    | 0.086    | <0.001    |
| Insulin, pmol/l         |                    |                   |                   |                   |                   |                   |          |           |
| Fasting                 | 204 (135, 262)     | 63 (42, 94)       | 142 (105, 206)    | 49 (38, 65)       | 127 (92, 183)     | 63 (41, 105)      | 0.001    | 0.001     |
| 1-hour                  | 1141 (676, 1440)   | 707 (347, 1175)   | 912 (584, 1343)   | 644(370, 1098)    | 708 (520, 1299)   | 424 (249, 927)    | 0.133    | 0.132     |
| 2-hour                  | 763 (377, 1299)    | 151 (69, 297)     | 470 (272, 840)    | 65 (40, 110)      | 456 (201, 801)    | 191 (103, 344)    | 0.024    | <0.001    |
| HOMA-IR                 | 6.8 (5.4, 9.0)     | 1.6 (1.2, 3.0)    | 4.5 (3.3, 6.4)    | 1.4 (1.0, 1.8)    | 3.9 (2.9, 6.6)    | 1.9 (1.2, 3.4)    | <0.001   | <0.001    |
| HbA1c, %                | 5.8 (5.5,6.4)      | 5.3 (5.1, 5.6)    | 5.6 (5.3, 6.1)    | 5.3 (5.1, 5.6)    | 5.6 (5.2, 5.9)    | 5.3 (5.1, 5.7)    | 0.001    | 0.625     |

Data are shown in Median (25th, 75th percentile). \*Kruskal-Wallis Test over the three different surgery groups pre-surgery and \*\* post-surgery
