# Supplementary material
Source: publisher figshare collection journal article supplement (https://karger.figshare.com/articles/dataset/_/8313056)
Supplement: Supplementary file 3 [file 1]

**Table S2. Patient's characteristics depicted by hypoglycaemia**

|                         | pre-surgery     |                  |         | post-surgery    |                  |         | change pre - post surgery |                   |         |
|-------------------------|-----------------|------------------|---------|-----------------|------------------|---------|---------------------------|-------------------|---------|
|                         | hypoglycaemia   | No hypoglycaemia | p-value | hypoglycaemia   | No hypoglycaemia | p-value | hypoglycaemia             | No hypoglycaemia  | p-value |
| Age, years              | 39 (29,45)      | 41 (37, 51)      | 0.014   | 41 (30, 45)     | 43 (39, 52)      | 0.063   | -2 (-3, -1)               | -2 (-3, -1)       | 0.093   |
| Weight, kg              | 130 (116,147)   | 128 (117, 141)   | 0.641   | 87 (79, 102)    | 90 (74, 99)      | 0.012   | 43 (36, 48)               | 40 (33,48)        | 0.013   |
| BMI, kg/m <sup>2</sup>  | 45 (41, 50)     | 45 (42, 50)      | 0.709   | 30 (27, 35)     | 31 (27, 35)      | 0.001   | 14.7 (12.6, 16.6)         | 13.9 (11.3, 17.1) | 0.037   |
| Waist Circumference, cm | 128 (121,141)   | 133 (125, 141)   | 0.217   | 103 (96, 108)   | 104 (96, 115)    | 0.289   | 26 (18, 37)               | 25 (20, 34)       | 0.766   |
| Systolic BP, mmHG       | 140 (130,155)   | 145 (140, 155)   | 0.124   | 121 (113, 131)  | 128 (11, 140)    | 0.089   | 17 (3, 27)                | 16 (3, 30)        | 0.873   |
| Diastolic BP, mmHg      | 90 (85,100)     | 90 (84, 96)      | 0.748   | 80 (74, 89)     | 80 (75, 90)      | 0.625   | 8 (-1, 17)                | 9 (0, 18)         | 0.846   |
| Glucose, mmol/l         |                 |                  |         |                 |                  |         |                           |                   |         |
| Fasting                 | 4.8 (4.7, 5.4)  | 5.1 (4.7, 5.9)   | 0.065   | 4.3 (4.2, 4.5)  | 4.5(4.3, 4.8)    | <0.001  | 0.7 (0.4, 1.3)            | 0.7 (0.1, 1.2)    | 0.226   |
| 1-hour                  | 8.7 (7.0, 10.0) | 8.7 (7.0, 10.8)  | 0.659   | 7.8 (6.2, 9.8)  | 7.7 (5.6, 9.2)   | 0.321   | 9.0 (-1.6, 2.6)           | 1.4 (0.3, 3.5)    | 0.109   |
| 2-hour                  | 5.5 (5.0-7.2)   | 6.9 (5.9, 8.1)   | 0.001   | 2.3 (2.0, 2.6)  | 3.9 (3.3, 4.7)   | <0.001  | 3.6 (2.8, 5.3)            | 3.1 (1.7, 4.4)    | 0.001   |
| Insulin, pmol/l         |                 |                  |         |                 |                  |         |                           |                   |         |
| Fasting                 | 140 (90, 185)   | 154 (113, 216)   | 0.104   | 49 (35, 63)     | 56 (35, 69)      | <0.001  | 93 (54, 136)              | 86 (40, 132)      | 0.443   |
| 1-hour                  | 917 (549, 1389) | 1090 (583, 1306) | 0.879   | 729 (451, 1743) | 660 (319,1000)   | <0.001  | 49 (-222, 653)            | 42 (-326, 708)    | 0.004   |
| 2-hour                  | 433 (250, 740)  | 524 (309, 901)   | 0.130   | 69 (35, 97)     | 90 (49, 167)     | <0.001  | 374 (169, 695)            | 364 (121, 656)    | 0.338   |
| HOMA-IR                 | 4.4 (2.7, 6.6)  | 5.4 (3.4, 7.4)   | 0.074   | 1.4 (0.9, 1.7)  | 1.5(1.1, 2.2)    | <0.001  | 3.3 (1.8, 4.7)            | 3.1 (1.5, 5.3)    | 0.564   |
| HbA1c, %                | 5.6 (5.3, 5.9)  | 5.7 (5.3, 6.2)   | 0.288   | 5.3 (5.0, 5.5)  | 5.3 (5.0, 5.6)   | 0.187   | 0.3 (0.1, 0.7)            | 0.4 (0.0, 0.8)    | 0.493   |

Data are shown in Median (25th, 75th percentile). \*Mann Whitney U Test between the different groups
