# Supplementary material
Source: publisher figshare collection journal article supplement (https://karger.figshare.com/articles/dataset/_/8313056)

Figure S1.

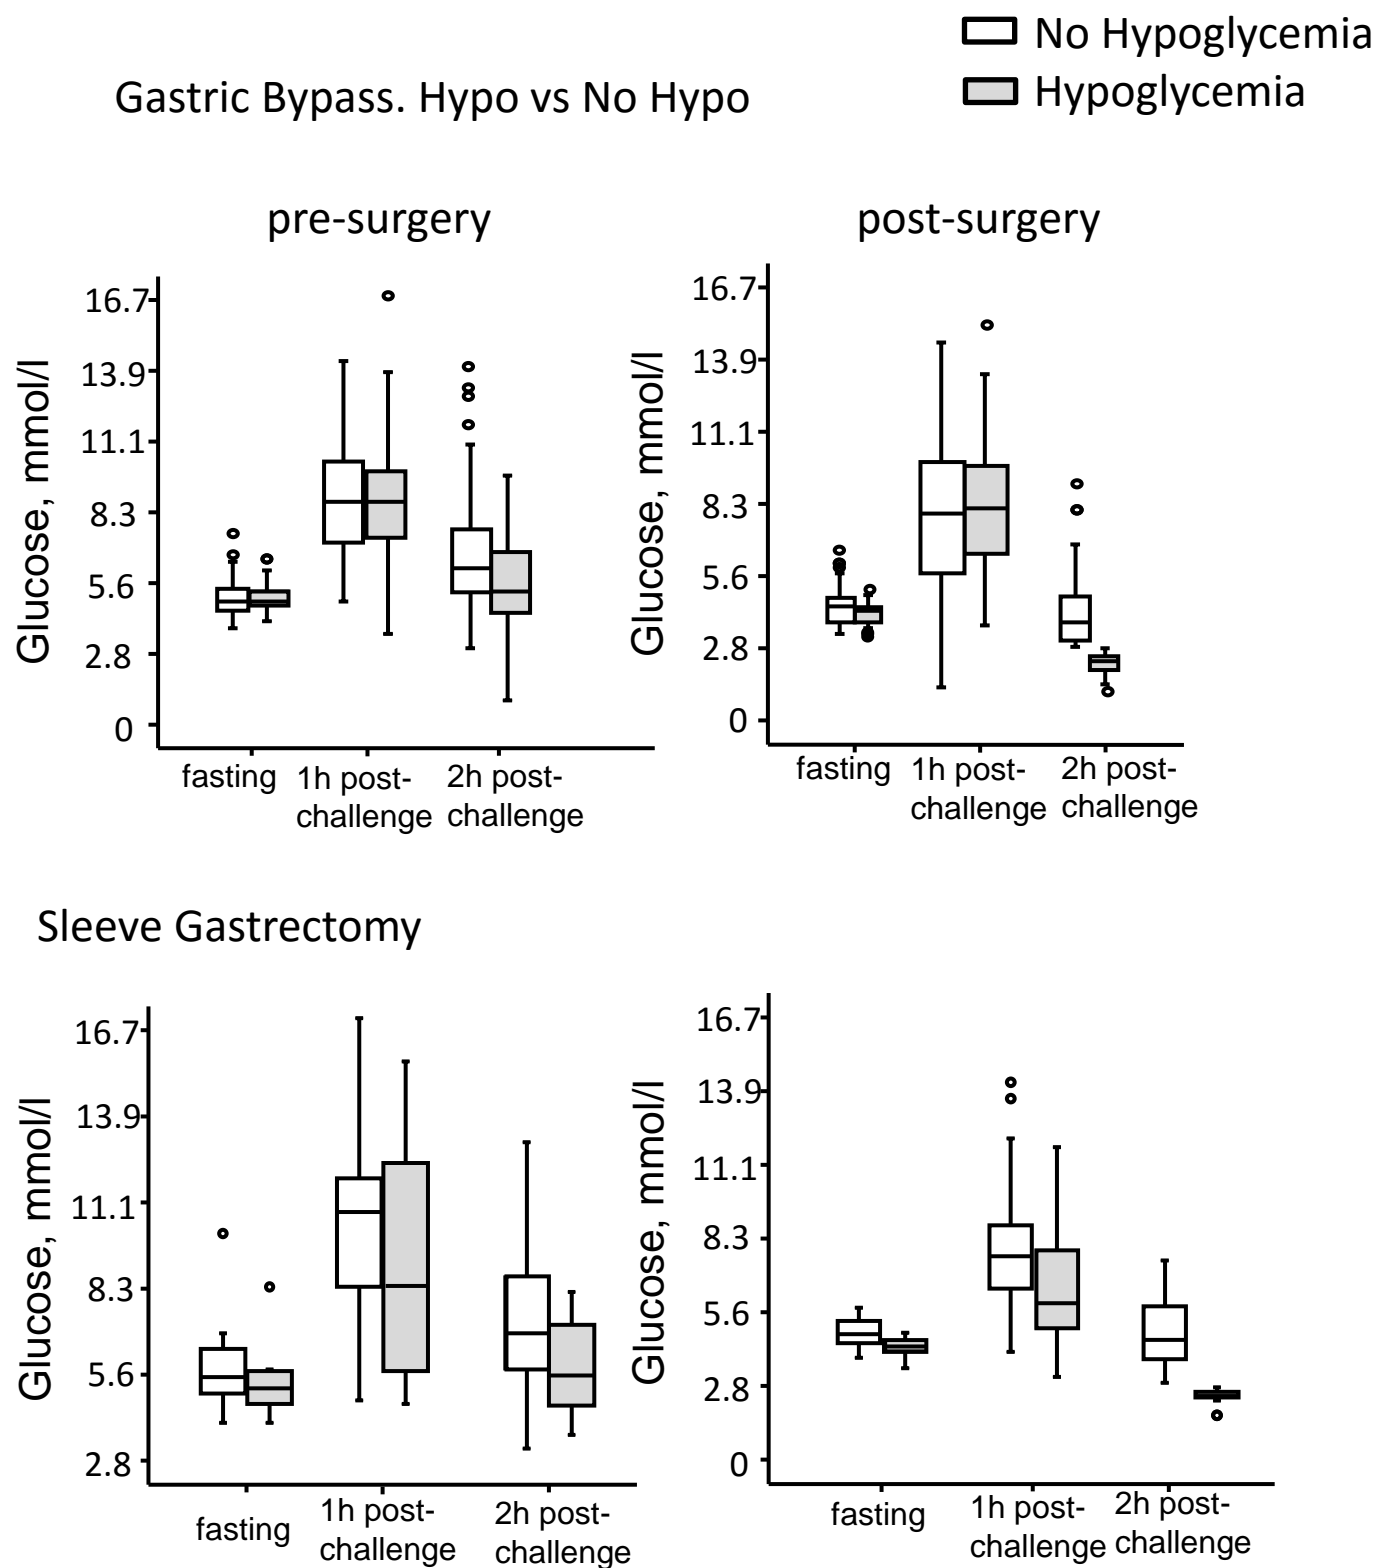

Gastric banding. Hypo vs No Hypo

No Hypoglycemia  
 Hypoglycemia

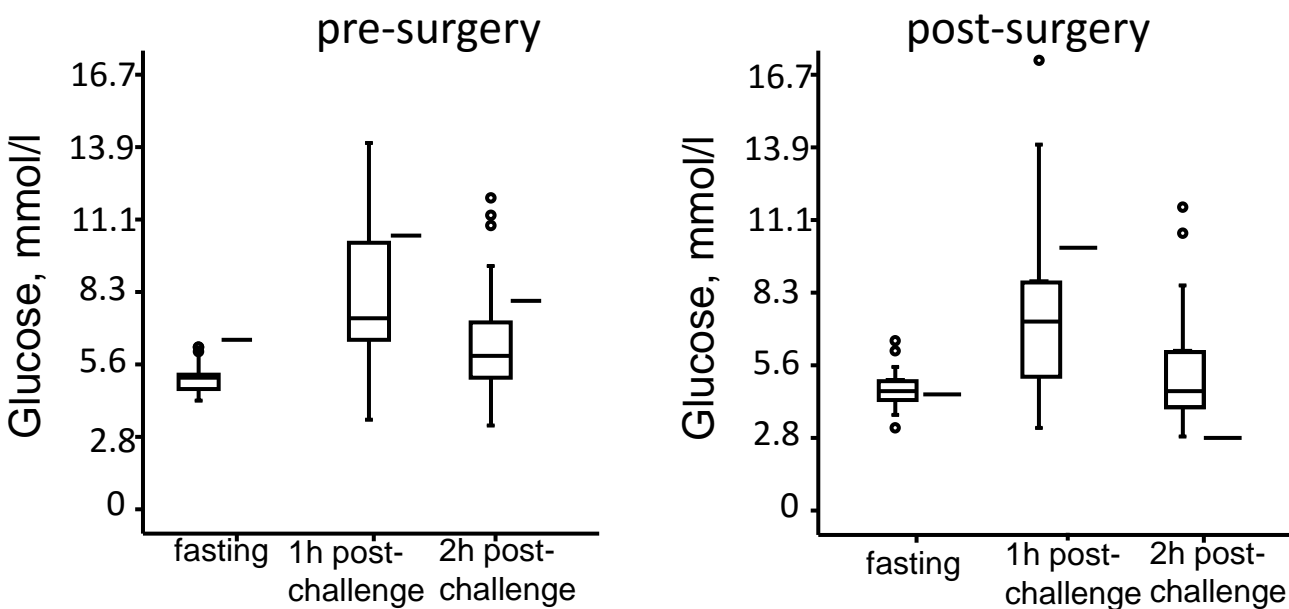

All.

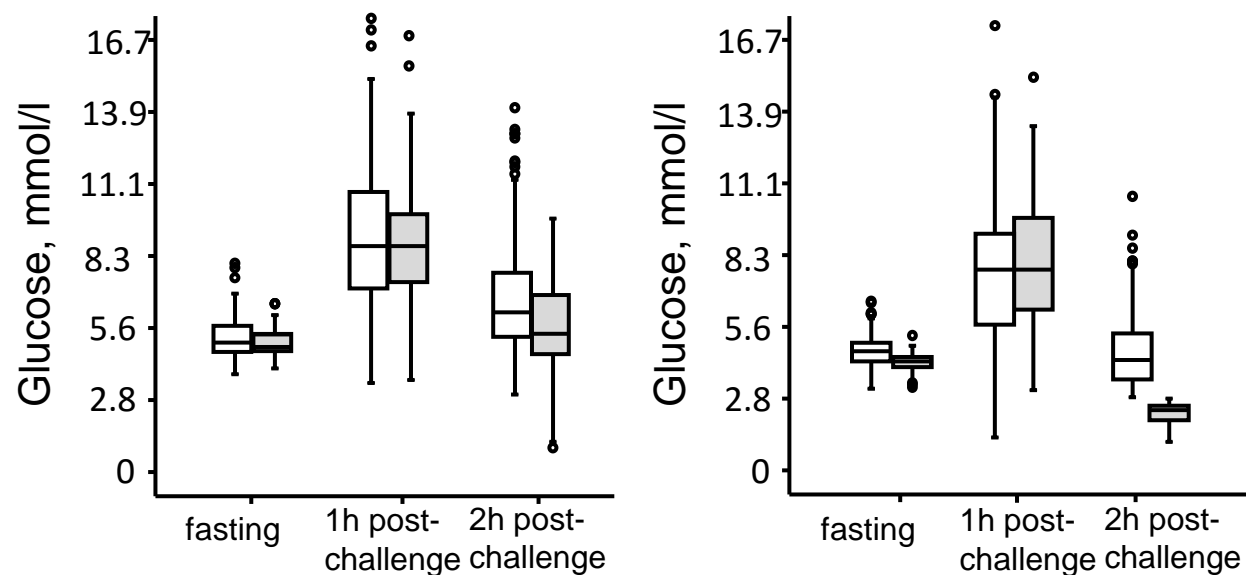

Supplement: Supplementary file 2 [file 1]
